# Supplementary material for: Characterisation of Bacteriocins Produced by Lactobacillus spp. Isolated from the Traditional Pakistani Yoghurt and Their Antimicrobial Activity against Common Foodborne Pathogens
Source: PubMed Central journal article supplement (PMC7503110; doi:10.1155/2020/8281623), 2020-09-12
Supplement: 8281623.f1.pdf [file 8281623.f1.pdf]

# Supplementary

**Table S1. Identification of *Lactobacillus spp.* based on physical and biochemical characteristics and antagonistic activity of bacteriocin extracts against Gram-positive and negative indicator organisms using the agar well diffusion method.**

| Biochemical and Physiological characteristics | <i>Lactobacillus helveticus</i> | <i>Lactobacillus plantarum</i> |
|-----------------------------------------------|---------------------------------|--------------------------------|
| Colony colour                                 | White                           | Yellow                         |
| Cell shape                                    | Rod in short chains             | Rods                           |
| Gram type                                     | Positive                        | Positive                       |
| Spore type                                    | Negative                        | Negative                       |
| Capsule type                                  | Negative                        | Negative                       |
| Motility test                                 | Positive                        | Positive                       |
| Pigmentation                                  | Negative                        | Positive                       |
| Indole test                                   | Negative                        | Negative                       |
| Methyl red test                               | Negative                        | Negative                       |
| Citrate utilization test                      | Positive                        | Positive                       |
| Hydrogen sulphide test                        | Negative                        | Negative                       |
| Nitrate reduction test                        | Negative                        | Negative                       |
| Oxidase test                                  | Negative                        | Negative                       |
| Catalase test                                 | Negative                        | Positive                       |
| NaCl Tolerance                                | Positive                        | Negative                       |

**Table S2 . Antagonistic activity of partially purified bacteriocin against Gram-negative clinical pathogens by agar well diffusion**

| Bacteriocin | Measurement of zones of inhibition(mm)Standard Deviation |                               |                                |                               |               |
|-------------|----------------------------------------------------------|-------------------------------|--------------------------------|-------------------------------|---------------|
|             | Clinical isolates of Gram-negative bacteria              |                               |                                |                               |               |
|             | <i>Klebsiella pneumonia</i>                              | <i>Pseudomonas aeruginosa</i> | <i>Acinetobacter baumannii</i> | <i>Salmonella paratyphi A</i> | <i>E.coli</i> |
| <b>LBp</b>  | 1.6±0.3                                                  | 16.3±0.12                     | 29.35±0.1                      | 16.6±0.5                      | 5.25±1        |
| <b>LBh</b>  | 2.52±0.06                                                | 15.3±0.12                     | 24.35±0.1                      | 13.5±1                        | 17.65±0.5     |

**Table S3. Antagonistic activity of partially purified bacteriocin against Gram-positive clinical pathogens by agar well diffusion**

| Bacteriocin | Measurement of zones of inhibition(mm)Standard Deviation |                          |                               |                              |             |
|-------------|----------------------------------------------------------|--------------------------|-------------------------------|------------------------------|-------------|
|             | Clinical Isolates of Gram-Positive Bacteria              |                          |                               |                              |             |
|             | <i>Enterococcus faeciumDO</i>                            | <i>Bacillus.subtilis</i> | <i>Streptococcus pyogenes</i> | <i>Staphylococcus aureus</i> | <i>MRSA</i> |
| <b>LBp</b>  | 13.6±0.1                                                 | 10.45±0.1                | 2.6±0.25                      | 21.2±0.1                     | 13.2±0.6    |
| <b>LBh</b>  | 11.45±1                                                  | 12.35±0.1                | 3.52±0.06                     | 19.3±0.15                    | 11.3±0.1    |

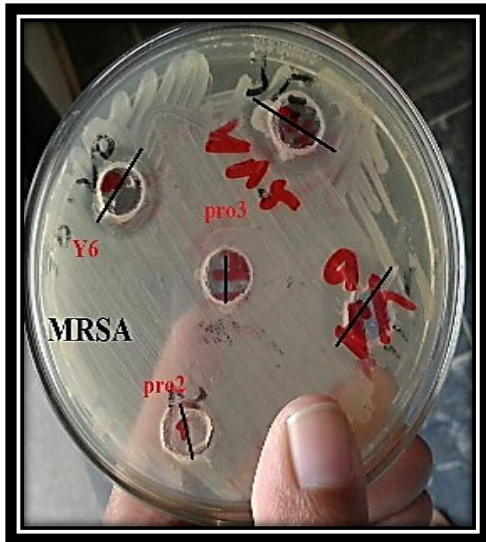

(a)

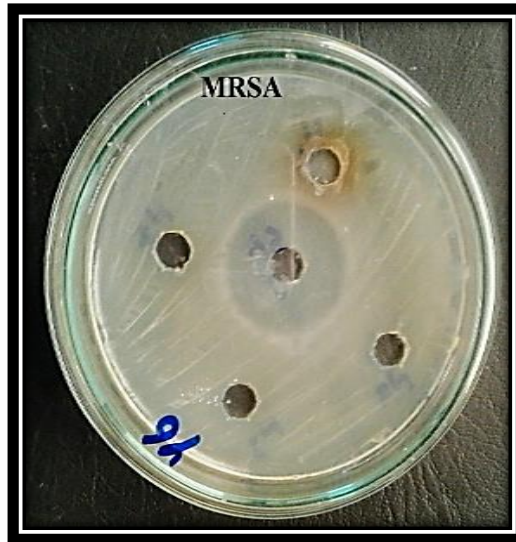

(b)

**Figure S 1. Effect of bacteriocin against methicillin-resistant *Staphylococcus aureus*:**(a) *Lactobacillus helveticus* (LBh) bacteriocin activity against methicillin resistance *Staphylococcus aureus* ,(b) *Lactobacillus plantarum* (LBp) bacteriocin activity against methicillin resistance *Staphylococcus aureus*

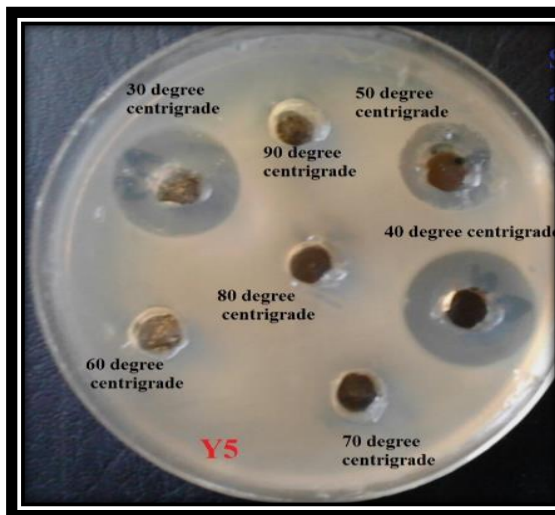

(a)

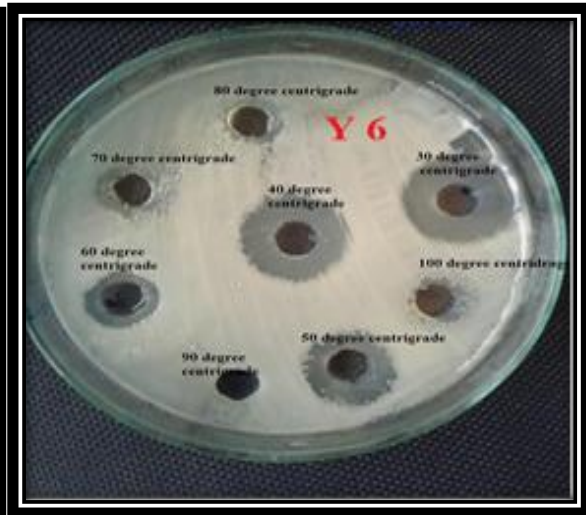

(b)

**Figure S2. Effect of temperature on bacteriocin against methicillin resistance *Staphylococcus aureus* :**(a) *Lactobacillus helveticus* (LBh) bacteriocin activity against methicillin resistance *Staphylococcus aureus* ,(b) *Lactobacillus plantarum* (LBp) bacteriocin activity against methicillin resistance *Staphylococcus aureus*.

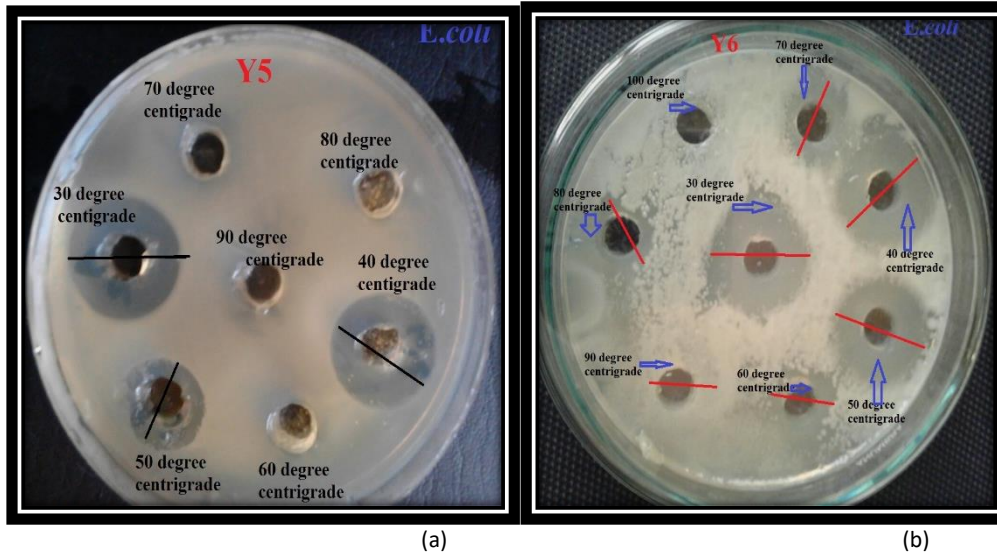

Figure S3. Effect of temperature on bacteriocin against *E.coli* :(a) *Lactobacillus helveticus* (LBh) bacteriocin activity against *E.coli* ,(b) *Lactobacillus plantarum* (LBp) bacteriocin activity against *E.coli*.

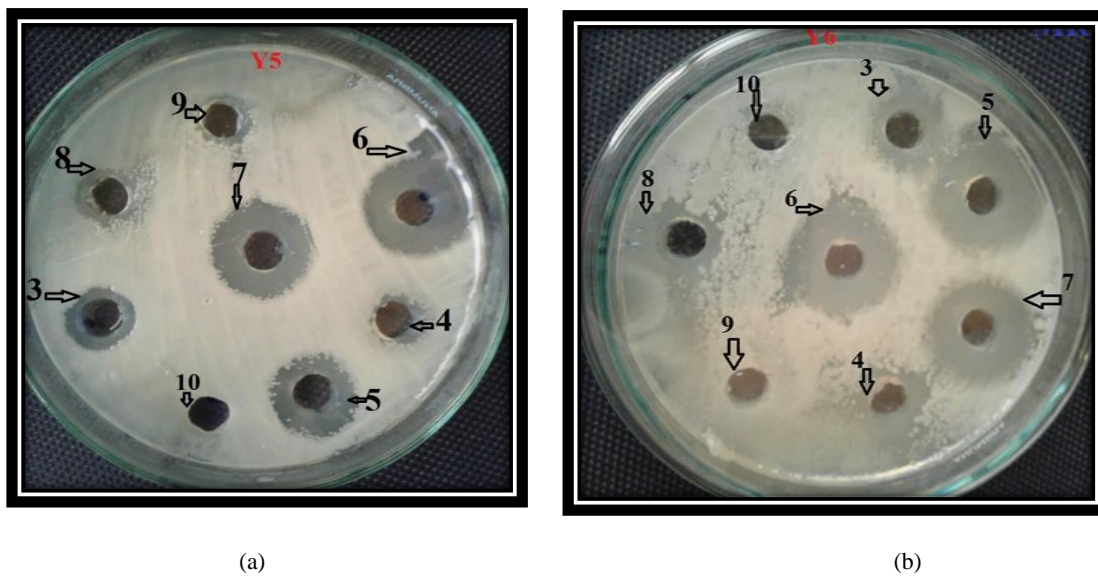

Figure S4. Effect of pH on bacteriocin against methicillin resistance *Staphylococcus aureus* :(a) *Lactobacillus helveticus* (LBh) bacteriocin activity against methicillin resistance *Staphylococcus aureus* ,(b) *Lactobacillus plantarum* (LBp) bacteriocin activity against methicillin resistance *Staphylococcus aureus*.

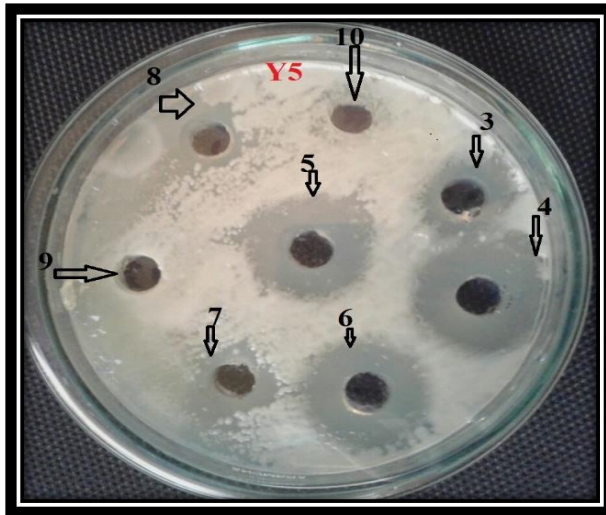

(a)

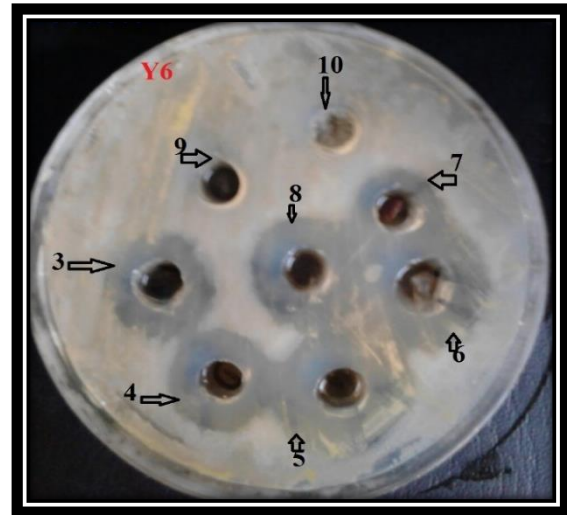

(b)

**Figure S5. Effect of pH on bacteriocin against *Acinetobacter*:**(a) *Lactobacillus helveticus* (LBh) bacteriocin activity against *Acinetobacter* ,(b) *Lactobacillus plantarum* (LBp) bacteriocin activity against *Acinetobacter*.

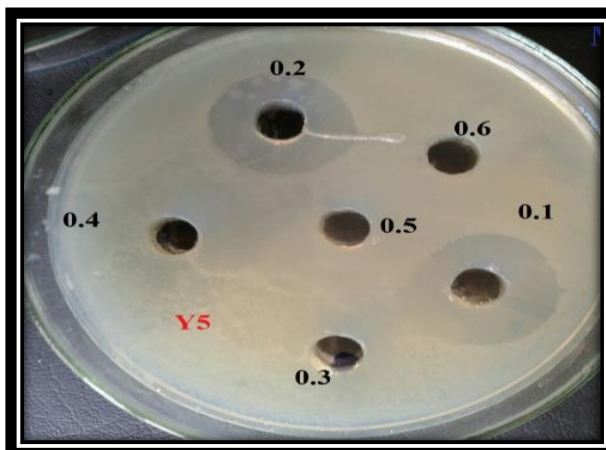

(a)

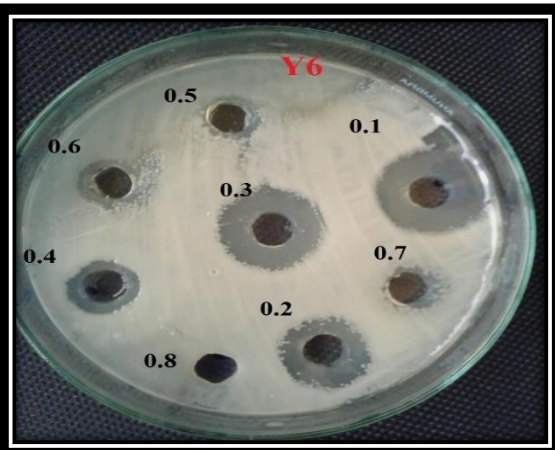

(b)

**Figure S6. Effect of Bile salt on bacteriocin against methicillin resistance *Staphylococcus aureus* :**(a) *Lactobacillus helveticus* (LBh) bacteriocin activity against Methicillin resistance *Staphylococcus aureus* ,(b) *Lactobacillus plantarum* (LBp) bacteriocin activity against Methicillin resistance *Staphylococcus aureus*.

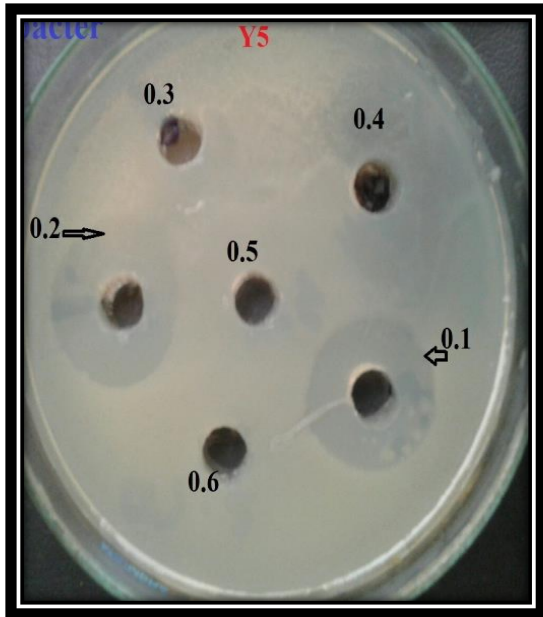

(a)

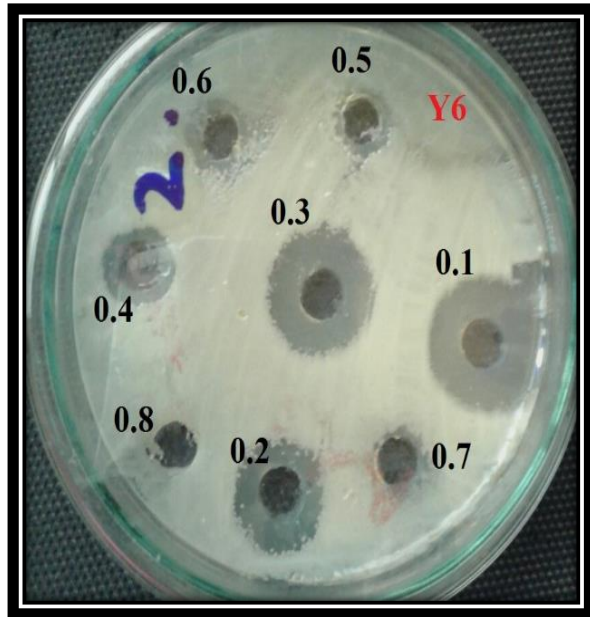

(b)

**Figure S7. Effect of bile salts on bacteriocin against *Acinetobacter*:**(a) *Lactobacillus helveticus* (LBh) bacteriocin activity against *Acinetobacter* ,(b) *Lactobacillus plantarum* (LBp) bacteriocin activity against *Acinetobacter*.

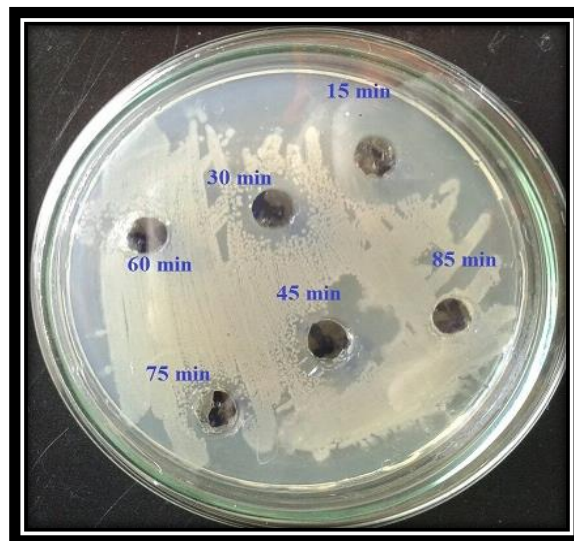

**Figure S8. Effect of UV on bacteriocin against *Acinetobacter*:**(a) *Lactobacillus helveticus* (LBh) bacteriocin activity against *Acinetobacter* ,
